# Supplementary material
Source: PubMed Central journal article supplement (PMC514458)

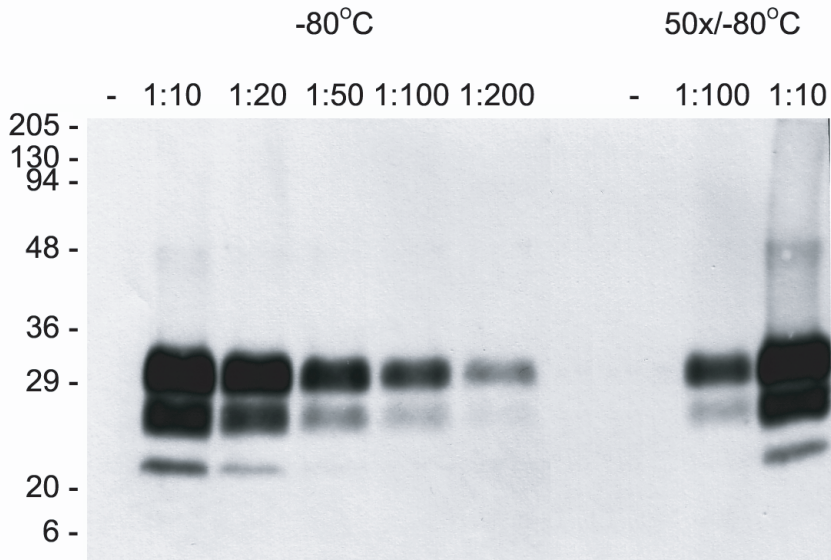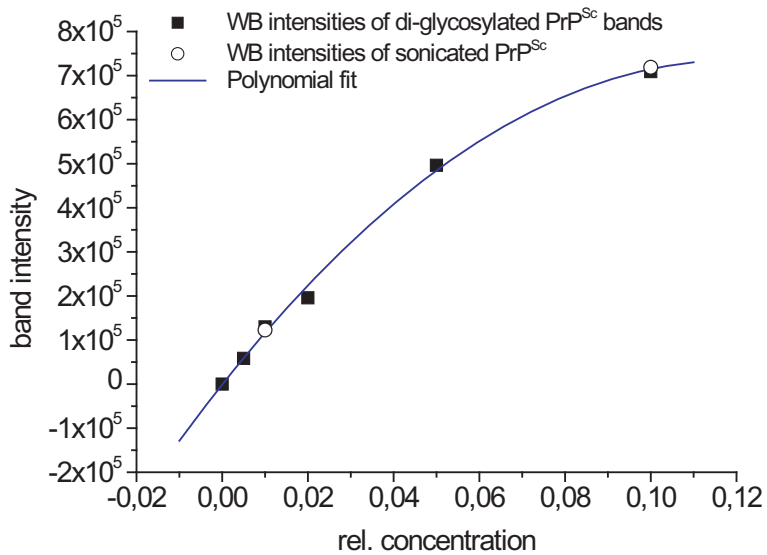

Supplement: pnas_101_33_12207__1.pdf [file pnas_101_33_12207__1.pdf]

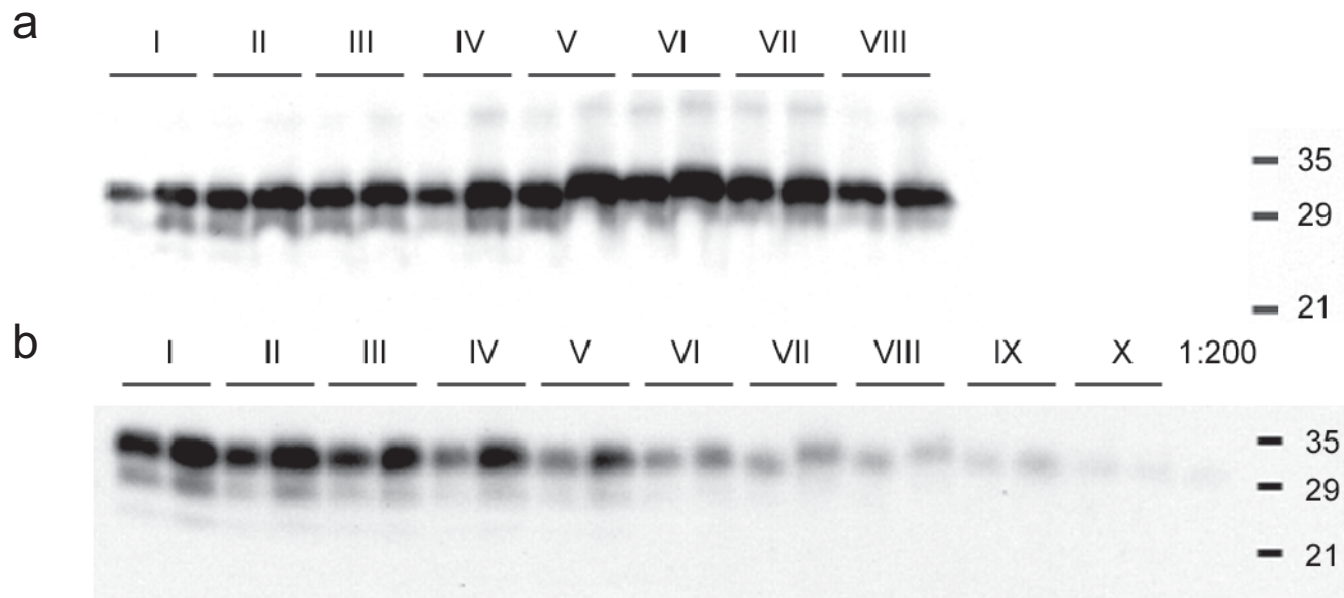

Supplement: pnas_101_33_12207__2.pdf [file pnas_101_33_12207__2.pdf]
